# Supplementary material for: MALDI-MS Analysis of Peptide Libraries Expands the Scope of Substrates for Farnesyltransferase
Source: MDPI journal article supplement (doi:10.3390/ijms222112042), 2021-11-07
Supplement: s1 [file s1]

# MALDI-MS analysis of peptide libraries expands the scope of substrates for farnesyltransferase

Garrett L Schey<sup>1</sup>, Peter H Buttery<sup>2</sup>, Emily R Hildebrandt<sup>3</sup>, Sadie X Novak<sup>4</sup>, Walter K Schmidt<sup>3</sup>, James L Hougland<sup>4,5</sup>, Mark D Distefano<sup>1,2</sup>

1 Department of Medicinal Chemistry, University of Minnesota, Minneapolis, Minnesota 55455, USA

2 Department of Chemistry, University of Minnesota, Minneapolis, Minnesota 55455, USA

3 Department of Biochemistry and Molecular Biology, University of Georgia, Athens, Georgia 30602, USA

4 Department of Chemistry, Syracuse University, Syracuse, New York 13244 USA

5 BioInspired Syracuse, Syracuse University, Syracuse, New York 13244 USA

## Table of Contents

|                                                                             |    |
|-----------------------------------------------------------------------------|----|
| <b>Table S1.</b> Mass of CaaaX library peptides .....                       | 3  |
| <b>Figure S1.</b> Optimization of enzyme concentration for CaaaX MALDI..... | 6  |
| <b>Figure S2.</b> MALDI/MS of CMIIX Library .....                           | 7  |
| <b>Figure S3.</b> MALDI/MS of CMa <sub>2</sub> IM Library .....             | 8  |
| <b>Figure S4.</b> MALDI/MS of CMIa <sub>3</sub> M Library .....             | 9  |
| <b>Table S2.</b> MS/MS of prenylated CaaaX library hits .....               | 10 |
| <b>Figure S5.</b> Structure of representative DsGRAGC(fn)MIIM peptide ..... | 12 |
| <b>Figure S6.</b> HPLC Fluorescence assay of CMIIS .....                    | 12 |
| <b>Figure S7.</b> HPLC Fluorescence assay of CSIIM .....                    | 13 |
| <b>Figure S8.</b> HPLC Fluorescence assay of CMKIM.....                     | 13 |
| <b>Figure S9.</b> HPLC Fluorescence assay of CMIGM.....                     | 14 |
| <b>Figure S10.</b> HPLC Fluorescence assay of CHIIM .....                   | 14 |
| <b>Figure S11.</b> HPLC Fluorescence assay of CMIK .....                    | 15 |
| <b>Figure S12.</b> HPLC Fluorescence assay of CYIIM .....                   | 15 |
| <b>Table S3.</b> CaaaX sequences in the human genome .....                  | 16 |

|                                                                                                                             |    |
|-----------------------------------------------------------------------------------------------------------------------------|----|
| <b>Figure S13.</b> Mobility shift analysis of Ydj1p-CaaaX variants in the presence and absence of farnesyltransferase ..... | 17 |
| <b>Table S4.</b> Percent farnesylation for Ydj1p-CaaaX variants evaluated in this study .....                               | 17 |
| <b>Figure S14.</b> Mobility shift analysis of Ydj1p-CaaaX variants .....                                                    | 18 |
| <b>Table S5.</b> Yeast strains used in this study .....                                                                     | 19 |
| <b>Table S6.</b> Plasmids used in this study .....                                                                          | 19 |

| Library               | Peptide Sequence         | Expected Mass | Observed Mass |
|-----------------------|--------------------------|---------------|---------------|
| Ca <sub>1</sub> IIM 1 | DsGRAGC <u>G</u> IIM     | 1110.4        | 1110.2        |
| Ca <sub>1</sub> IIM 1 | DsGRAGC <u>S</u> IIM     | 1140.4        | 1140.2        |
| Ca <sub>1</sub> IIM 1 | DsGRAGC(fn) <u>S</u> IIM | 1344.8        | 1344.4        |
| Ca <sub>1</sub> IIM 1 | DsGRAGC <u>V</u> IIM     | 1152.5        | 1152.3        |
| Ca <sub>1</sub> IIM 1 | DsGRAGC <u>C</u> IIM     | 1156.5        | 1156.2        |
| Ca <sub>1</sub> IIM 1 | DsGRAGC(fn) <u>C</u> IIM | 1360.8        | 1360.4        |
| Ca <sub>1</sub> IIM 1 | DsGRAGC <u>I</u> IIM     | 1166.5        | 1166.3        |
| Ca <sub>1</sub> IIM 1 | DsGRAGC <u>N</u> IIM     | 1167.4        | 1167.3        |
| Ca <sub>1</sub> IIM 1 | DsGRAGC(fn) <u>N</u> IIM | 1371.8        | 1371.4        |
| Ca <sub>1</sub> IIM 1 | DsGRAGC <u>K</u> IIM     | 1181.5        | 1181.3        |
| Ca <sub>1</sub> IIM 1 | DsGRAGC <u>M</u> IIM     | 1184.5        | 1184.2        |
| Ca <sub>1</sub> IIM 1 | DsGRAGC(fn) <u>M</u> IIM | 1388.9        | 1388.4        |
| Ca <sub>1</sub> IIM 1 | DsGRAGC <u>F</u> IIM     | 1200.5        | 1200.3        |
| Ca <sub>1</sub> IIM 1 | DsGRAGC(fn) <u>F</u> IIM | 1404.9        | 1404.4        |
| Ca <sub>1</sub> IIM 1 | DsGRAGC <u>Y</u> IIM     | 1216.5        | 1216.2        |
| Ca <sub>1</sub> IIM 1 | DsGRAGC(fn) <u>Y</u> IIM | 1420.9        | 1420.4        |
| Ca <sub>1</sub> IIM 2 | DsGRAGC <u>A</u> IIM     | 1124.4        | 1124.3        |
| Ca <sub>1</sub> IIM 2 | DsGRAGC(fn) <u>A</u> IIM | 1328.8        | 1328.4        |
| Ca <sub>1</sub> IIM 2 | DsGRAGC <u>P</u> IIM     | 1150.4        | 1150.3        |
| Ca <sub>1</sub> IIM 2 | DsGRAGC(fn) <u>P</u> IIM | 1354.8        | 1354.4        |
| Ca <sub>1</sub> IIM 2 | DsGRAGC <u>T</u> IIM     | 1154.4        | 1154.2        |
| Ca <sub>1</sub> IIM 2 | DsGRAGC <u>L</u> IIM     | 1166.5        | 1166.3        |
| Ca <sub>1</sub> IIM 2 | DsGRAGC <u>D</u> IIM     | 1168.4        | 1168.2        |
| Ca <sub>1</sub> IIM 2 | DsGRAGC <u>Q</u> IIM     | 1181.5        | 1181.2        |
| Ca <sub>1</sub> IIM 2 | DsGRAGC(fn) <u>Q</u> IIM | 1385.8        | 1385.4        |
| Ca <sub>1</sub> IIM 2 | DsGRAGC <u>E</u> IIM     | 1182.4        | 1182.3        |
| Ca <sub>1</sub> IIM 2 | DsGRAGC(fn) <u>E</u> IIM | 1386.8        | 1386.4        |
| Ca <sub>1</sub> IIM 2 | DsGRAGC <u>H</u> IIM     | 1190.5        | 1190.3        |
| Ca <sub>1</sub> IIM 2 | DsGRAGC(fn) <u>H</u> IIM | 1394.8        | 1394.4        |
| Ca <sub>1</sub> IIM 2 | DsGRAGC <u>R</u> IIM     | 1209.5        | 1209.3        |
| Ca <sub>1</sub> IIM 2 | DsGRAGC <u>W</u> IIM     | 1239.5        | 1239.3        |
| CMa <sub>2</sub> IM 1 | DsGRAGC <u>M</u> GIM     | 1128.4        | 1128.1        |
| CMa <sub>2</sub> IM 1 | DsGRAGC(fn) <u>M</u> GIM | 1332.8        | 1332.2        |
| CMa <sub>2</sub> IM 1 | DsGRAGC <u>M</u> SIM     | 1158.4        | 1158.1        |
| CMa <sub>2</sub> IM 1 | DsGRAGC(fn) <u>M</u> SIM | 1362.8        | 1362.3        |
| CMa <sub>2</sub> IM 1 | DsGRAGC <u>M</u> VIM     | 1170.5        | 1170.1        |
| CMa <sub>2</sub> IM 1 | DsGRAGC <u>M</u> CIM     | 1174.5        | 1174.1        |
| CMa <sub>2</sub> IM 1 | DsGRAGC <u>M</u> IIM     | 1184.5        | 1184.2        |
| CMa <sub>2</sub> IM 1 | DsGRAGC <u>M</u> NIM     | 1185.5        | 1185.1        |
| CMa <sub>2</sub> IM 1 | DsGRAGC(fn) <u>M</u> NIM | 1389.2        | 1389.3        |
| CMa <sub>2</sub> IM 1 | DsGRAGC <u>M</u> KIM     | 1199.5        | 1199.2        |
| CMa <sub>2</sub> IM 1 | DsGRAGC(fn) <u>M</u> KIM | 1403.9        | 1303.4        |
| CMa <sub>2</sub> IM 1 | DsGRAGC <u>M</u> MIM     | 1202.6        | 1202.1        |
| CMa <sub>2</sub> IM 1 | DsGRAGC <u>M</u> FIM     | 1218.5        | 1218.1        |
| CMa <sub>2</sub> IM 1 | DsGRAGC <u>M</u> YIM     | 1234.5        | 1234.1        |
| CMa <sub>2</sub> IM 2 | DsGRAGC <u>M</u> AIM     | 1142.4        | 1142.1        |
| CMa <sub>2</sub> IM 2 | DsGRAGC <u>M</u> PIIM    | 1168.5        | 1168.1        |
| CMa <sub>2</sub> IM 2 | DsGRAGC <u>M</u> TIM     | 1172.5        | 1172.1        |

|                       |                 |        |        |
|-----------------------|-----------------|--------|--------|
| CMa <sub>2</sub> IM 2 | DsGRAGCMLIM     | 1184.5 | 1184.1 |
| CMa <sub>2</sub> IM 2 | DsGRAGCMDIM     | 1186.5 | 1186.1 |
| CMa <sub>2</sub> IM 2 | DsGRAGCMQIM     | 1199.5 | 1199.1 |
| CMa <sub>2</sub> IM 2 | DsGRAGC(fn)MQIM | 1403.9 | 1403.3 |
| CMa <sub>2</sub> IM 2 | DsGRAGCMEIM     | 1200.5 | 1200.1 |
| CMa <sub>2</sub> IM 2 | DsGRAGC(fn)MEIM | 1404.8 | 1404.3 |
| CMa <sub>2</sub> IM 2 | DsGRAGCMHIM     | 1208.5 | 1208.1 |
| CMa <sub>2</sub> IM 2 | DsGRAGC(fn)MHIM | 1412.9 | 1412.3 |
| CMa <sub>2</sub> IM 2 | DsGRAGCMRIM     | 1227.6 | 1227.1 |
| CMa <sub>2</sub> IM 2 | DsGRAGC(fn)MRIM | 1431.9 | 1431.3 |
| CMa <sub>2</sub> IM 2 | DsGRAGCMWIM     | 1257.6 | 1257.1 |
| CMla <sub>3</sub> M 1 | DsGRAGCMIGM     | 1128.4 | 1128.2 |
| CMla <sub>3</sub> M 1 | DsGRAGC(fn)MIGM | 1332.8 | 1332.3 |
| CMla <sub>3</sub> M 1 | DsGRAGCMISM     | 1158.4 | 1158.2 |
| CMla <sub>3</sub> M 1 | DsGRAGC(fn)MISM | 1362.8 | 1362.3 |
| CMla <sub>3</sub> M 1 | DsGRAGCMIVM     | 1170.5 | 1170.3 |
| CMla <sub>3</sub> M 1 | DsGRAGCMICM     | 1174.5 | 1174.2 |
| CMla <sub>3</sub> M 1 | DsGRAGC(fn)MICM | 1378.9 | 1378.3 |
| CMla <sub>3</sub> M 1 | DsGRAGCMIIM     | 1184.5 | 1184.3 |
| CMla <sub>3</sub> M 1 | DsGRAGCMINM     | 1185.5 | 1185.2 |
| CMla <sub>3</sub> M 1 | DsGRAGC(fn)MINM | 1389.2 | 1389.3 |
| CMla <sub>3</sub> M 1 | DsGRAGCMIKM     | 1199.5 | 1199.3 |
| CMla <sub>3</sub> M 1 | DsGRAGCMIMM     | 1202.6 | 1202.2 |
| CMla <sub>3</sub> M 1 | DsGRAGC(fn)MIMM | 1406.9 | 1406.3 |
| CMla <sub>3</sub> M 1 | DsGRAGCMIFM     | 1218.5 | 1218.2 |
| CMla <sub>3</sub> M 1 | DsGRAGC(fn)MIFM | 1422.9 | 1422.3 |
| CMla <sub>3</sub> M 1 | DsGRAGCMIYM     | 1234.5 | 1234.2 |
| CMla <sub>3</sub> M 2 | DsGRAGCMIAM     | 1142.4 | 1142.3 |
| CMla <sub>3</sub> M 2 | DsGRAGC(fn)MIAM | 1346.8 | 1346.4 |
| CMla <sub>3</sub> M 2 | DsGRAGCMIPM     | 1168.5 | 1168.3 |
| CMla <sub>3</sub> M 2 | DsGRAGCMITM     | 1172.5 | 1172.4 |
| CMla <sub>3</sub> M 2 | DsGRAGC(fn)MITM | 1376.8 | 1376.5 |
| CMla <sub>3</sub> M 2 | DsGRAGCMILM     | 1184.5 | 1184.3 |
| CMla <sub>3</sub> M 2 | DsGRAGC(fn)MILM | 1388.9 | 1388.5 |
| CMla <sub>3</sub> M 2 | DsGRAGCMIDM     | 1186.5 | 1186.4 |
| CMla <sub>3</sub> M 2 | DsGRAGCMIQM     | 1199.5 | 1199.4 |
| CMla <sub>3</sub> M 2 | DsGRAGC(fn)MIQM | 1403.9 | 1403.5 |
| CMla <sub>3</sub> M 2 | DsGRAGCMIEM     | 1200.5 | 1200.3 |
| CMla <sub>3</sub> M 2 | DsGRAGC(fn)MIEM | 1404.8 | 1404.5 |
| CMla <sub>3</sub> M 2 | DsGRAGCMIHM     | 1208.5 | 1208.4 |
| CMla <sub>3</sub> M 2 | DsGRAGC(fn)MIHM | 1412.9 | 1412.5 |
| CMla <sub>3</sub> M 2 | DsGRAGCMIRM     | 1227.6 | 1227.4 |
| CMla <sub>3</sub> M 2 | DsGRAGCMIWM     | 1257.6 | 1257.4 |
| CMIIIX 1              | DsGRAGCMIIG     | 1110.4 | 1110.3 |
| CMIIIX 1              | DsGRAGCMIIS     | 1140.4 | 1140.3 |
| CMIIIX 1              | DsGRAGC(fn)MIIS | 1344.8 | 1344.4 |
| CMIIIX 1              | DsGRAGCMIIV     | 1152.5 | 1152.3 |
| CMIIIX 1              | DsGRAGCMIIC     | 1156.5 | 1156.3 |
| CMIIIX 1              | DsGRAGC(fn)MIIC | 1360.8 | 1360.4 |

|          |                         |        |        |
|----------|-------------------------|--------|--------|
| CMIIIX 1 | DsGRAGCMIII <u>I</u>    | 1166.5 | 1166.3 |
| CMIIIX 1 | DsGRAGCMII <u>N</u>     | 1167.4 | 1167.2 |
| CMIIIX 1 | DsGRAGCMII <u>K</u>     | 1181.5 | 1181.3 |
| CMIIIX 1 | DsGRAGC(fn)MII <u>K</u> | 1385.9 | 1385.5 |
| CMIIIX 2 | DsGRAGCMII <u>A</u>     | 1124.4 | 1124.2 |
| CMIIIX 2 | DsGRAGC(fn)MII <u>A</u> | 1328.8 | 1328.4 |
| CMIIIX 2 | DsGRAGCMII <u>P</u>     | 1150.4 | 1150.3 |
| CMIIIX 2 | DsGRAGCMII <u>T</u>     | 1154.4 | 1154.2 |
| CMIIIX 2 | DsGRAGCMII <u>L</u>     | 1166.5 | 1166.3 |
| CMIIIX 2 | DsGRAGCMII <u>D</u>     | 1168.4 | 1168.2 |
| CMIIIX 2 | DsGRAGCMII <u>Q</u>     | 1181.5 | 1181.3 |
| CMIIIX 2 | DsGRAGC(fn)MII <u>Q</u> | 1385.8 | 1385.4 |
| CMIIIX 2 | DsGRAGCMII <u>M</u>     | 1184.5 | 1184.2 |
| CMIIIX 2 | DsGRAGC(fn)MII <u>M</u> | 1388.9 | 1388.4 |
| CMIIIX 2 | DsGRAGCMII <u>R</u>     | 1209.5 | 1209.3 |
| CMIIIX 2 | DsGRAGCMII <u>W</u>     | 1239.5 | 1239.3 |

**Table S1.** Mass of CaaaX library peptides. Expected and observed mass for all pentapeptide starting material from MALDI libraries, as well as the prenylated products.

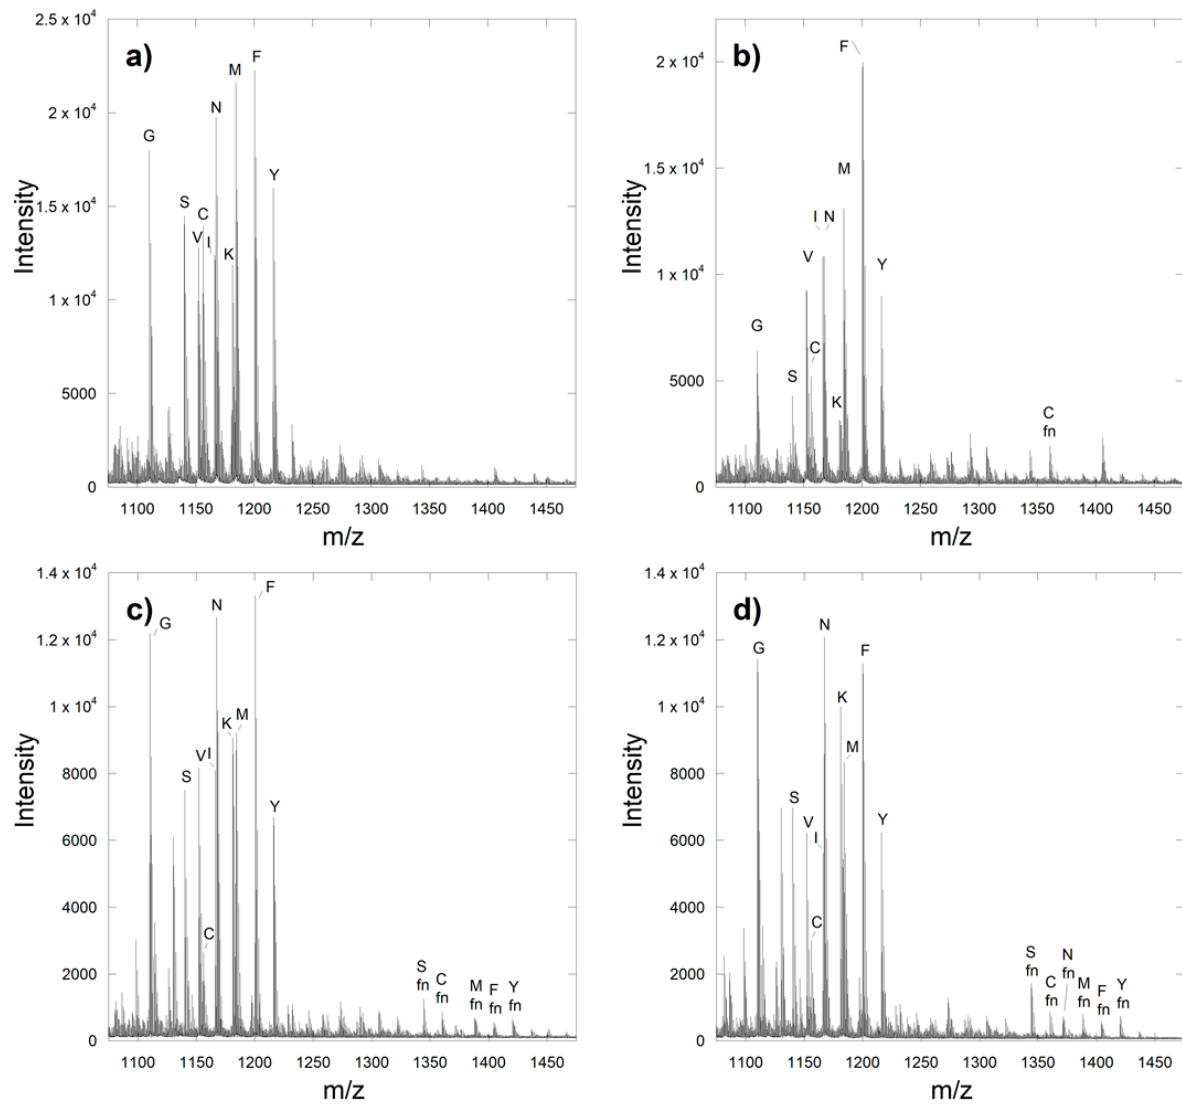

**Figure S1.** Optimization of enzyme concentration for CaaaX MALDI. DsGRAGCMIX library 1 reacted with (a) no enzyme (b) 100 nM enzyme (c) 1 uM enzyme (d) 10 uM enzyme

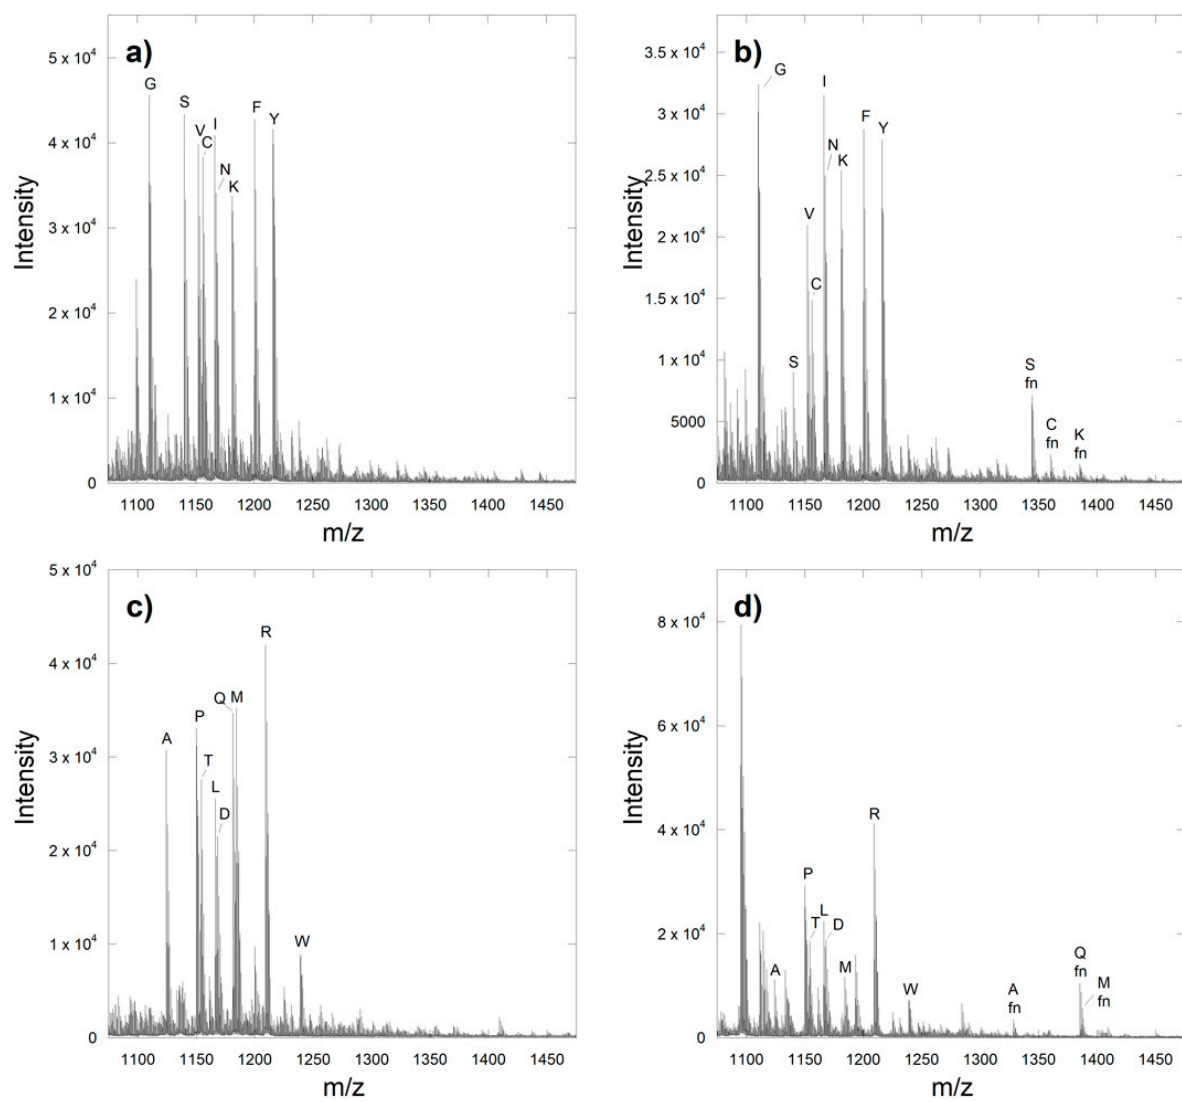

**Figure S2.** MALDI/MS of DsGRAGCMIIX libraries. Library 1 (a) before and (b) after prenylation with 1 uM yFTase. Library 2 (c) before and (d) after prenylation with 1 uM yFTase.

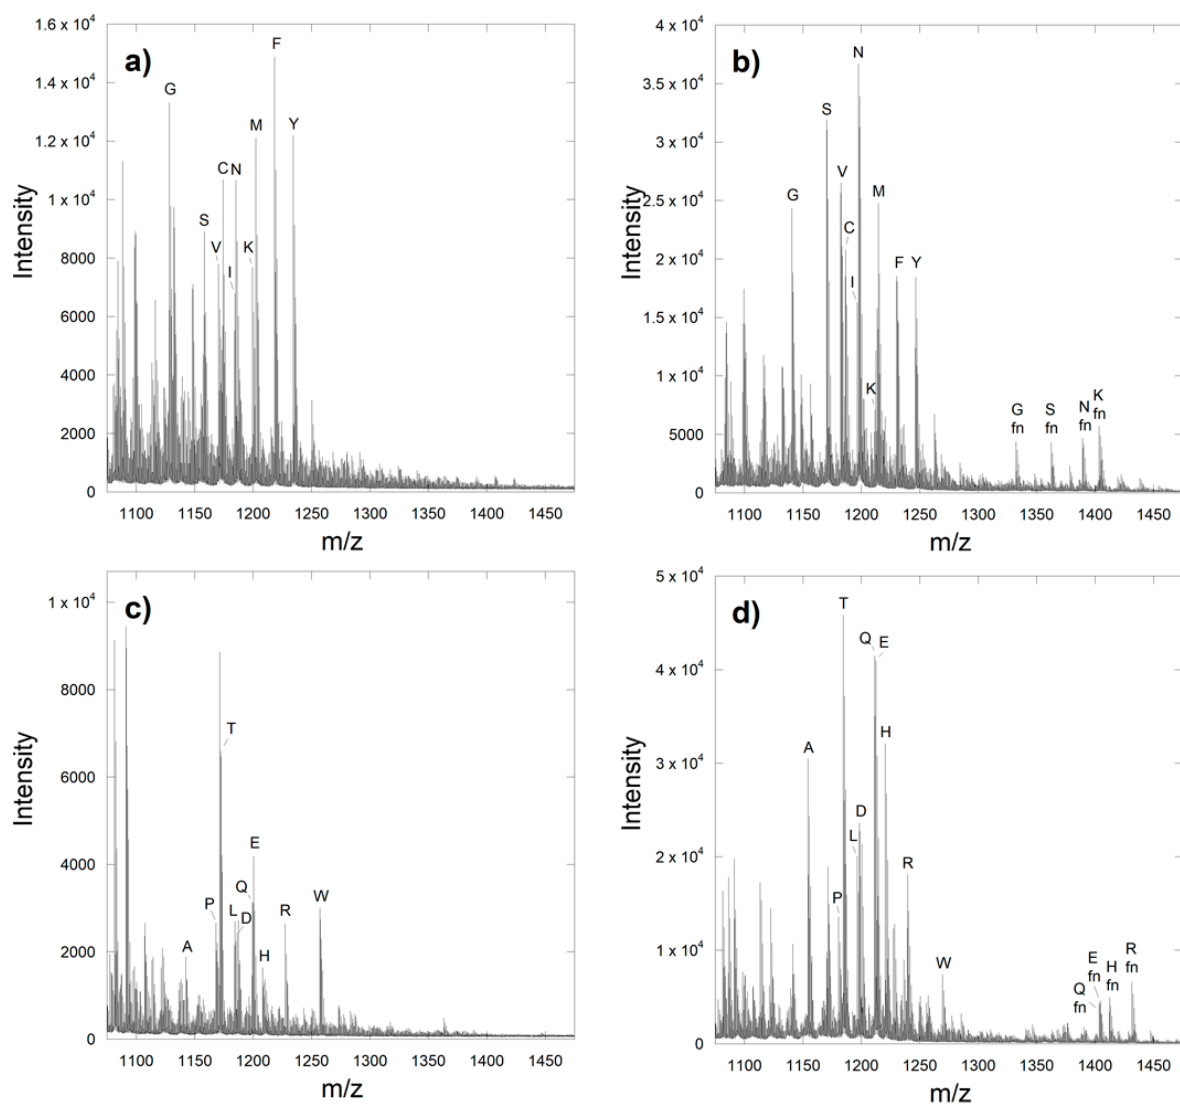

**Figure S3.** MALDI/MS of DsGRAGCma<sub>2</sub>IM libraries. Library 1 (a) before and (b) after prenylation with 1 uM yFTase. Library 2 (c) before and (d) after prenylation with 1 uM yFTase.



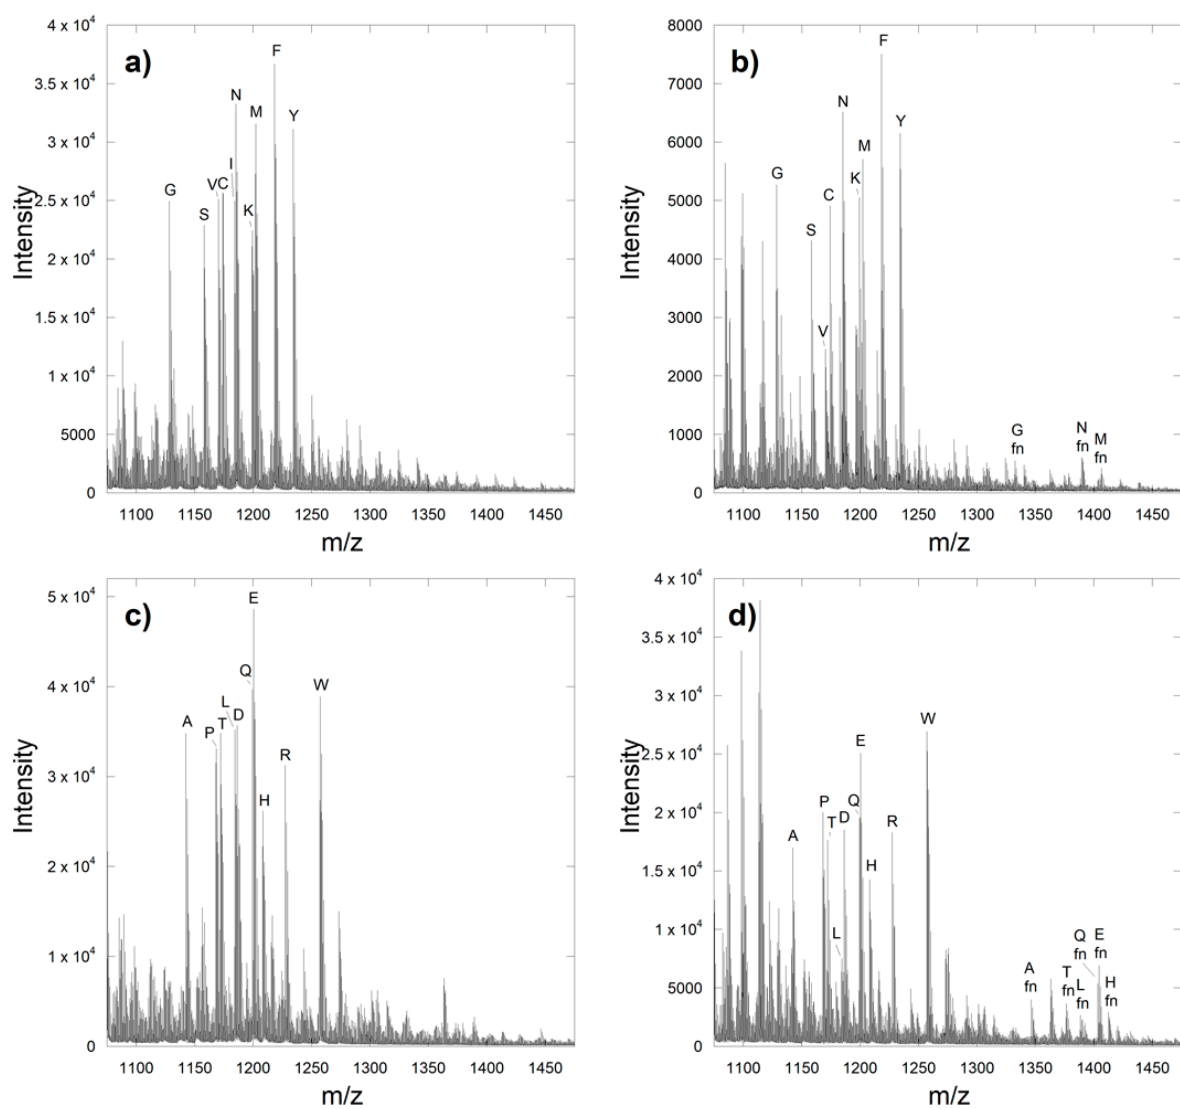

**Figure S4.** MALDI/MS of DsGRAGCMIa<sub>3</sub>M libraries. Library 1 (a) before and (b) after prenylation with 1  $\mu$ M yFTase. Library 2 (c) before and (d) after prenylation with 1  $\mu$ M yFTase.

| Sequence    | Formula                                                                                        | +/- Fn | ion  | Expected mass | Observed mass |
|-------------|------------------------------------------------------------------------------------------------|--------|------|---------------|---------------|
| DsGRAGCMIIS | C <sub>63</sub> H <sub>103</sub> N <sub>13</sub> O <sub>13</sub> S <sub>3</sub> 2 <sup>+</sup> | +      | M+2H | 672.85        | 672.85        |
|             | C <sub>25</sub> H <sub>35</sub> N <sub>8</sub> O <sub>6</sub> S <sup>+</sup>                   | +      | b4   | 575.24        | 575.24        |
|             | C <sub>43</sub> H <sub>64</sub> N <sub>9</sub> O <sub>7</sub> S <sub>2</sub> <sup>+</sup>      | +      | b5   | 882.44        | 882.43        |
|             | C <sub>48</sub> H <sub>73</sub> N <sub>10</sub> O <sub>8</sub> S <sub>3</sub> <sup>+</sup>     | +      | b6   | 1013.48       | 1013.48       |
|             | C <sub>54</sub> H <sub>84</sub> N <sub>11</sub> O <sub>9</sub> S <sub>3</sub> <sup>+</sup>     | +      | b7   | 1126.56       | 1126.56       |
|             | C <sub>48</sub> H <sub>78</sub> N <sub>13</sub> O <sub>13</sub> S <sub>3</sub> <sup>+</sup>    | -      | M+H  | 1140.50       | 1140.50       |
|             | C <sub>25</sub> H <sub>35</sub> N <sub>8</sub> O <sub>6</sub> S <sup>+</sup>                   | -      | b4   | 575.24        | 575.24        |
|             | C <sub>28</sub> H <sub>40</sub> N <sub>9</sub> O <sub>7</sub> S <sub>2</sub> <sup>+</sup>      | -      | b5   | 678.25        | 678.25        |
|             | C <sub>33</sub> H <sub>49</sub> N <sub>10</sub> O <sub>8</sub> S <sub>3</sub> <sup>+</sup>     | -      | b6   | 809.29        | 809.29        |
| DsGRAGCMIHQ | C <sub>65</sub> H <sub>106</sub> N <sub>14</sub> O <sub>13</sub> S <sub>3</sub> 2 <sup>+</sup> | +      | M+2H | 693.36        | 693.36        |
|             | C <sub>25</sub> H <sub>35</sub> N <sub>8</sub> O <sub>6</sub> S <sup>+</sup>                   | +      | b4   | 575.24        | 575.24        |
|             | C <sub>43</sub> H <sub>64</sub> N <sub>9</sub> O <sub>7</sub> S <sub>2</sub> <sup>+</sup>      | +      | b5   | 882.44        | 882.43        |
|             | C <sub>48</sub> H <sub>73</sub> N <sub>10</sub> O <sub>8</sub> S <sub>3</sub> <sup>+</sup>     | +      | b6   | 1013.48       | 1013.47       |
|             | C <sub>54</sub> H <sub>84</sub> N <sub>11</sub> O <sub>9</sub> S <sub>3</sub> <sup>+</sup>     | +      | b7   | 1126.56       | 1126.56       |
|             | C <sub>60</sub> H <sub>95</sub> N <sub>12</sub> O <sub>10</sub> S <sub>3</sub> <sup>+</sup>    | +      | b8   | 1239.65       | 1239.64       |
|             | C <sub>50</sub> H <sub>81</sub> N <sub>14</sub> O <sub>13</sub> S <sub>3</sub> <sup>+</sup>    | -      | M+H  | 1181.53       | 1181.53       |
|             | C <sub>25</sub> H <sub>35</sub> N <sub>8</sub> O <sub>6</sub> S <sup>+</sup>                   | -      | b4   | 575.24        | 575.24        |
|             | C <sub>28</sub> H <sub>40</sub> N <sub>9</sub> O <sub>7</sub> S <sub>2</sub> <sup>+</sup>      | -      | b5   | 678.25        | 678.25        |
|             | C <sub>33</sub> H <sub>49</sub> N <sub>10</sub> O <sub>8</sub> S <sub>3</sub> <sup>+</sup>     | -      | b6   | 809.29        | 809.29        |
| DsGRAGCSIIM | C <sub>63</sub> H <sub>103</sub> N <sub>13</sub> O <sub>13</sub> S <sub>3</sub> 2 <sup>+</sup> | +      | M+2H | 672.85        | 672.85        |
|             | C <sub>25</sub> H <sub>35</sub> N <sub>8</sub> O <sub>6</sub> S <sup>+</sup>                   | +      | b4   | 575.24        | 575.24        |
|             | C <sub>43</sub> H <sub>64</sub> N <sub>9</sub> O <sub>7</sub> S <sub>2</sub> <sup>+</sup>      | +      | b5   | 882.44        | 882.43        |
|             | C <sub>46</sub> H <sub>69</sub> N <sub>10</sub> O <sub>9</sub> S <sub>2</sub> <sup>+</sup>     | +      | b6   | 969.47        | 969.46        |
|             | C <sub>52</sub> H <sub>80</sub> N <sub>11</sub> O <sub>10</sub> S <sub>2</sub> <sup>+</sup>    | +      | b7   | 1082.55       | 1082.54       |
|             | C <sub>48</sub> H <sub>78</sub> N <sub>14</sub> O <sub>14</sub> S <sub>3</sub> <sup>+</sup>    | -      | M+H  | 1140.50       | 1140.50       |
|             | C <sub>25</sub> H <sub>35</sub> N <sub>8</sub> O <sub>6</sub> S <sup>+</sup>                   | -      | b4   | 575.24        | 575.24        |
|             | C <sub>28</sub> H <sub>40</sub> N <sub>9</sub> O <sub>7</sub> S <sub>2</sub> <sup>+</sup>      | -      | b5   | 678.25        | 678.25        |
|             | C <sub>31</sub> H <sub>45</sub> N <sub>10</sub> O <sub>9</sub> S <sub>2</sub> <sup>+</sup>     | -      | b6   | 765.28        | 765.28        |
| DsGRAGCMKIM | C <sub>65</sub> H <sub>108</sub> N <sub>14</sub> O <sub>12</sub> S <sub>4</sub> <sup>+</sup>   | +      | M+2H | 702.36        | 702.36        |
|             | C <sub>25</sub> H <sub>35</sub> N <sub>8</sub> O <sub>6</sub> S <sup>+</sup>                   | +      | b4   | 575.24        | 575.24        |

|             |                                     |   |      |         |         |
|-------------|-------------------------------------|---|------|---------|---------|
|             | $C_{43}H_{64}N_9O_7S_2^+$           | + | b5   | 882.44  | 882.43  |
|             | $C_{48}H_{73}N_{10}O_8S_3^+$        | + | b6   | 1013.48 | 1013.48 |
|             | $C_{50}H_{83}N_{14}O_{12}S_4^+$     | - | M+H  | 1199.53 | 1199.53 |
|             | $C_{25}H_{35}N_8O_6S^+$             | - | b4   | 575.24  | 575.24  |
|             | $C_{28}H_{40}N_9O_7S_2^+$           | - | b5   | 678.25  | 678.25  |
|             | $C_{33}H_{49}N_{10}O_8S_3^+$        | - | b6   | 809.29  | 809.29  |
|             | $C_{39}H_{61}N_{12}O_9S_3^+$        | - | b7   | 937.38  | 937.39  |
|             | $C_{45}H_{72}N_{13}O_{10}S_3^+$     | - | b8   | 1050.47 | 1050.47 |
| DsGRAGCYIIM | $C_{69}H_{107}N_{13}O_{13}S_3^{2+}$ | + | M+2H | 710.86  | 710.86  |
|             | $C_{23}H_{32}N_7O_5S^+$             | + | b3   | 518.22  | 518.22  |
|             | $C_{25}H_{35}N_8O_6S^+$             | + | b4   | 575.24  | 575.24  |
|             | $C_{43}H_{64}N_9O_7S_2^+$           | + | b5   | 882.44  | 882.44  |
|             | $C_{52}H_{73}N_{10}O_9S_2^+$        | + | b6   | 1045.50 | 1045.50 |
|             | $C_{58}H_{84}N_{11}O_{10}S_2^+$     | + | b7   | 1158.58 | 1158.58 |
|             | $C_{23}H_{33}N_7O_5S^+$             | - | b3   | 518.22  | 518.23  |
|             | $C_{25}H_{35}N_8O_6S^+$             | - | b4   | 575.24  | 575.24  |
|             | $C_{28}H_{40}N_9O_7S_2^+$           | - | b5   | 678.25  | 678.25  |
|             | $C_{37}H_{49}N_{10}O_9S_2^+$        | - | b6   | 841.31  | 841.31  |
| DsGRAGCHIIM | $C_{66}H_{105}N_{15}O_{12}S_3^{2+}$ | + | M+2H | 697.86  | 697.86  |
|             | $C_{25}H_{35}N_8O_6S^+$             | + | b4   | 575.24  | 575.24  |
|             | $C_{43}H_{64}N_9O_7S_2^+$           | + | b5   | 882.44  | 882.43  |
|             | $C_{49}H_{71}N_{12}O_8S_2^+$        | + | b6   | 1019.50 | 1019.49 |
|             | $C_{51}H_{80}N_{15}O_{12}S_3^+$     | - | M+H  | 1190.53 | 1190.53 |
|             | $C_{25}H_{35}N_8O_6S^+$             | - | b4   | 575.24  | 575.24  |
|             | $C_{28}H_{40}N_9O_7S_2^+$           | - | b5   | 678.25  | 678.25  |
|             | $C_{34}H_{47}N_{12}O_8S_2^+$        | - | b6   | 815.31  | 815.32  |
| DsGRAGCMIGM | $C_{61}H_{99}N_{13}O_{12}S_4^{2+}$  | + | M+2H | 666.82  | 666.82  |
|             | $C_{25}H_{35}N_8O_6S^+$             | + | b4   | 575.24  | 575.23  |
|             | $C_{43}H_{64}N_9O_7S_2^+$           | + | b5   | 882.44  | 882.43  |
|             | $C_{48}H_{78}N_{10}O_8S_3^+$        | + | b6   | 1013.48 | 1013.48 |
|             | $C_{54}H_{84}N_{11}O_9S_3^+$        | + | b7   | 1026.56 | 1026.58 |
|             | $C_{56}H_{87}N_{12}O_{10}S_3^+$     | + | b8   | 1183.58 | 1183.58 |
|             | $C_{46}H_{74}N_{13}O_{12}S_4^+$     | - | M+H  | 1128.45 | 1128.45 |

|  |                              |   |    |        |        |
|--|------------------------------|---|----|--------|--------|
|  | $C_{25}H_{35}N_8O_6S^+$      | - | b4 | 575.24 | 575.23 |
|  | $C_{28}H_{40}N_9O_7S_2^+$    | - | b5 | 678.25 | 678.25 |
|  | $C_{33}H_{49}N_{10}O_8S_3^+$ | - | b6 | 809.29 | 809.28 |

**Table S2.** MS/MS of prenylated CaaaX library hits. MS/MS ions of prenylated peptides, indicating the Cys is prenylated. b ions for the prenylated peptide are shown, as well as b ions that have also lost the prenyl group.

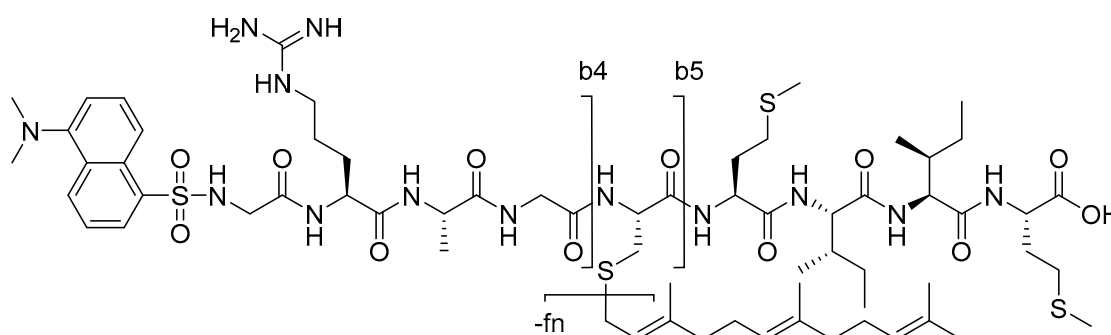

**Figure S5.** Structure of representative DsGRAGC(fn)MIIM peptide. The major ions used to confirm S-farnesylation are labeled

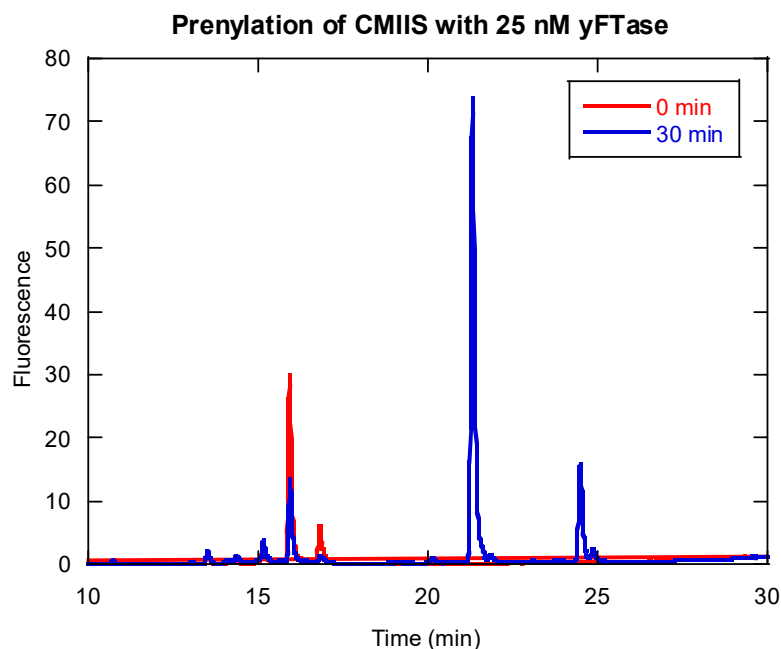

**Figure S6.** HPLC Fluorescence assay of CMIIS. HPLC assay quantifying the farnesylation of the peptide DsGRAGCMIIS by the fluorescence of the Dansyl group (ex. 220/em. 495). Reaction of 2.4  $\mu$ M peptide with 25 nM yFTase

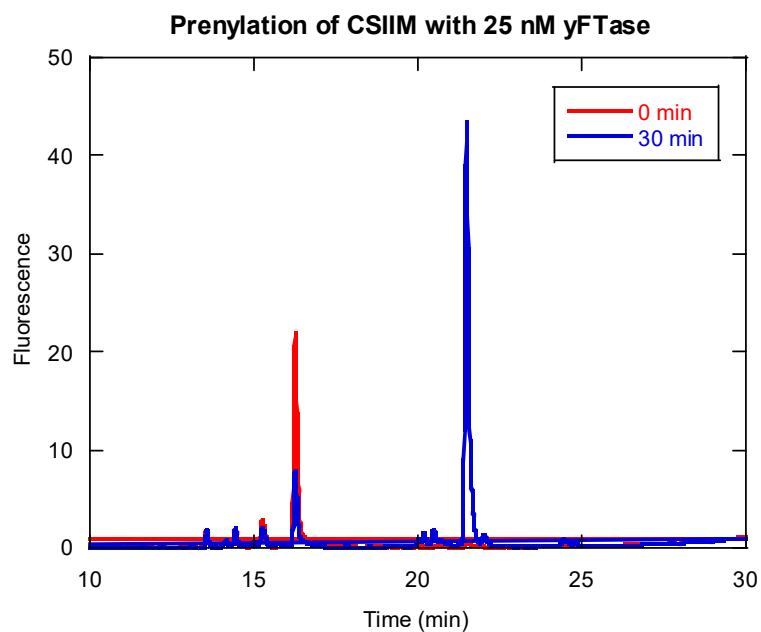

**Figure S7.** HPLC Fluorescence assay of CSIIM. HPLC assay quantifying the farnesylation of the peptide DsGRAGCSIIM by the fluorescence of the Dansyl group (ex. 220/em. 495). Reaction of 2.4  $\mu$ M peptide with 25 nM yFTase.

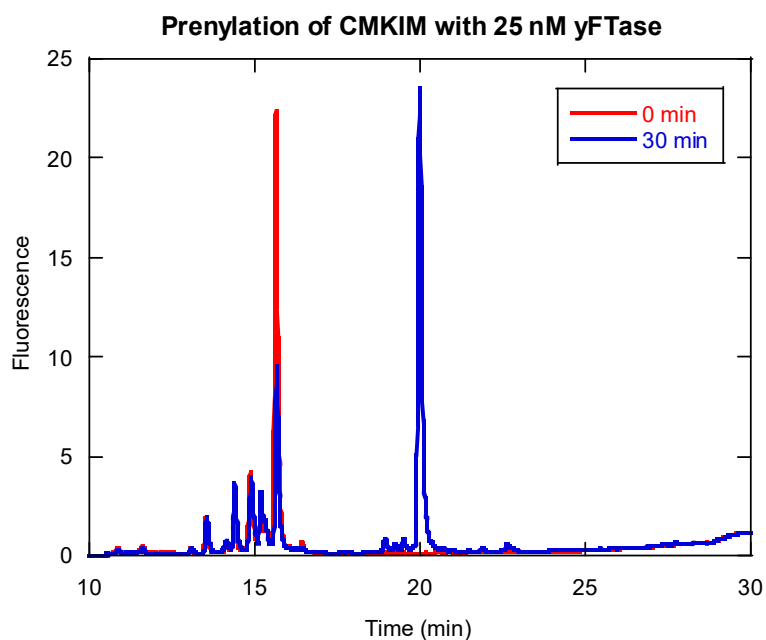

**Figure S8.** HPLC Fluorescence assay of CMKIM. HPLC assay quantifying the conversion of the peptide DsGRAGCMKIM by the fluorescence of the Dansyl group (ex. 220/em. 495). Reaction of 2.4  $\mu$ M peptide with 25 nM yFTase.

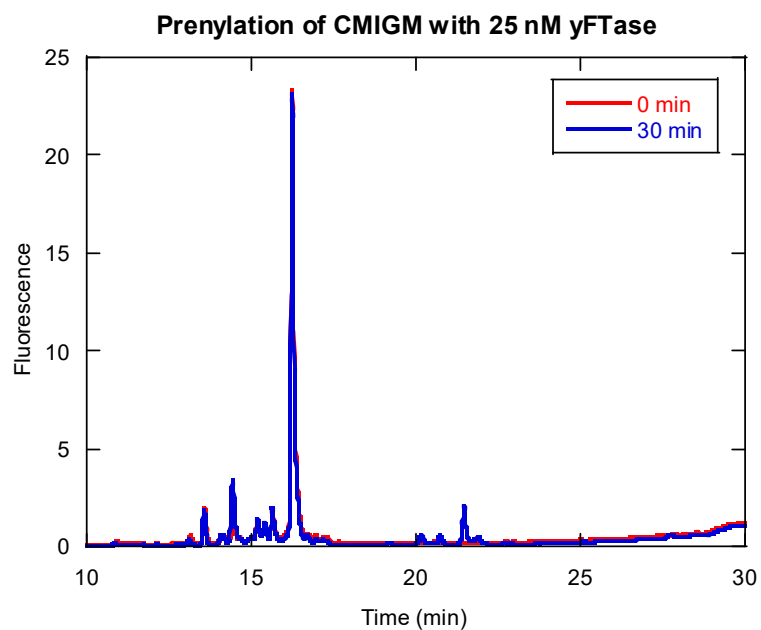

**Figure S9.** HPLC Fluorescence assay of CMIGM. HPLC assay quantifying the conversion the peptide DsGRAGCMIGM by the fluorescence of the Dansyl group (ex. 220/em. 495). Reaction of 2.4  $\mu$ M peptide with 25 nM yFTase.

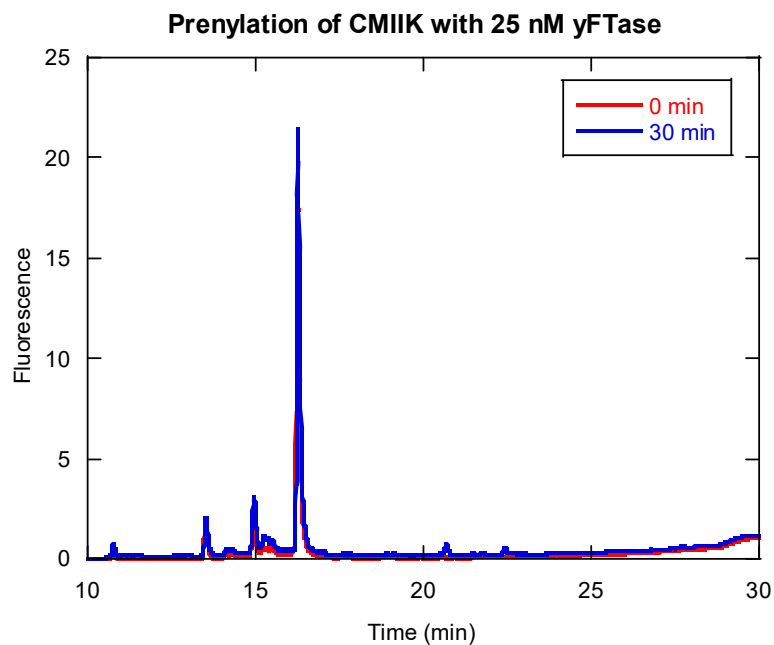

**Figure S10.** HPLC Fluorescence assay of CMIK. HPLC assay quantifying the conversion the peptide DsGRAGCMIK by the fluorescence of Dansyl group (ex. 220/em. 495). Reaction of 2.4  $\mu$ M peptide with 25 nM yFTase.

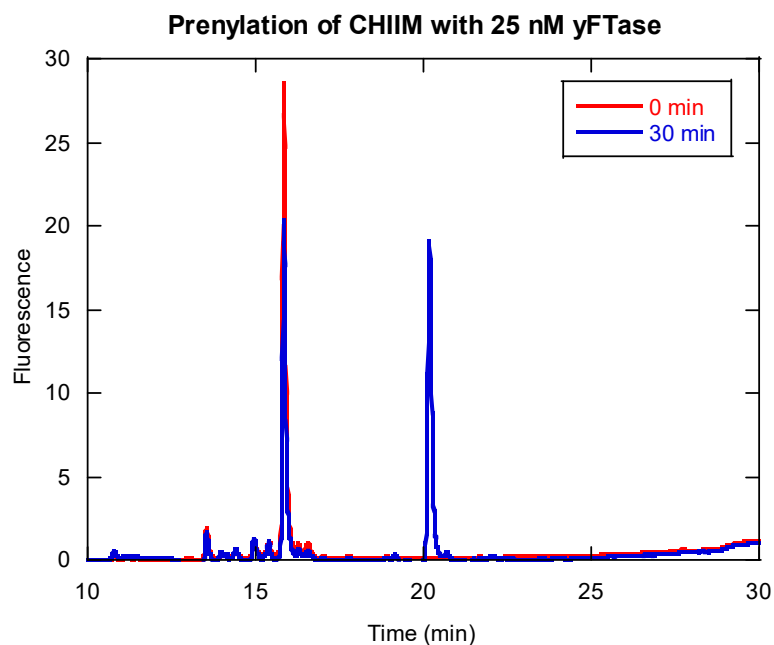

**Figure S11.** HPLC Fluorescence assay of CHIIM. HPLC assay quantifying the conversion the peptide DsGRAGCHIIM by the fluorescence of Dansylglycine (ex. 220/em. 495). Reaction of 2.4  $\mu$ M peptide with 25 nM yFTase

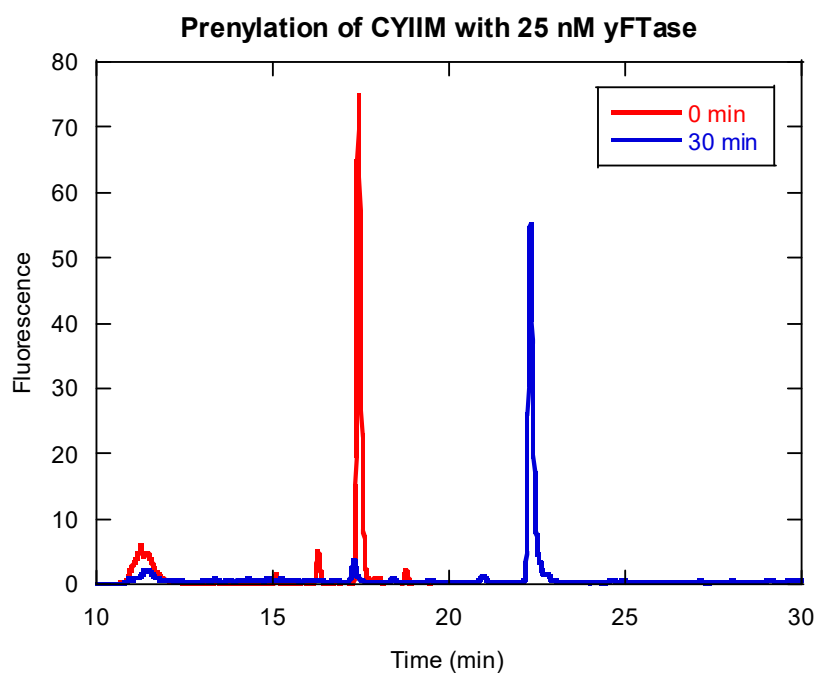

**Figure S12.** HPLC Fluorescence assay of CYIIM. HPLC assay quantifying the conversion the peptide DsGRAGCYIIM by the fluorescence of Dansyl group (ex. 220/em. 495). Reaction of 2.4  $\mu$ M peptide with 25 nM yFTase.

| Sequence | Protein name                                                            | Uniprot ID                                                                                      |
|----------|-------------------------------------------------------------------------|-------------------------------------------------------------------------------------------------|
| CSQAS    | Xaa-Pro aminopeptidase 3                                                | <a href="https://www.uniprot.org/uniprot/Q9NQH7">https://www.uniprot.org/uniprot/Q9NQH7</a>     |
| CSLMQ    | Transcription elongation factor A protein 3                             | <a href="https://www.uniprot.org/uniprot/O75764-2">https://www.uniprot.org/uniprot/O75764-2</a> |
| CSTAN    | Neuronal acetylcholine receptor subunit alpha-7                         | <a href="https://www.uniprot.org/uniprot/P36544-3">https://www.uniprot.org/uniprot/P36544-3</a> |
| CASSQ    | T cell receptor beta variable 14                                        | <a href="https://www.uniprot.org/uniprot/A0A5B0">https://www.uniprot.org/uniprot/A0A5B0</a>     |
| CMTSQ    | Beta-1,4 N-acetylgalactosaminyltransferase 1                            | <a href="https://www.uniprot.org/uniprot/Q00973">https://www.uniprot.org/uniprot/Q00973</a>     |
| CLTIQ    | Acetyl-coenzyme A synthetase, cytoplasmic                               | <a href="https://www.uniprot.org/uniprot/Q9NR19">https://www.uniprot.org/uniprot/Q9NR19</a>     |
| CVQTS    | Thymosin beta-15A                                                       | <a href="https://www.uniprot.org/uniprot/P0CG34">https://www.uniprot.org/uniprot/P0CG34</a>     |
| CNVT5    | Orphan sodium- and chloride-dependent neurotransmitter transporter NTT5 | <a href="https://www.uniprot.org/uniprot/Q9GZN6">https://www.uniprot.org/uniprot/Q9GZN6</a>     |
| CASLS    | Proline-rich protein 5-like                                             | <a href="https://www.uniprot.org/uniprot/Q6MZQ0">https://www.uniprot.org/uniprot/Q6MZQ0</a>     |
| CLISS    | Regulator of G-protein signaling 7-binding protein                      | <a href="https://www.uniprot.org/uniprot/Q6MZT1">https://www.uniprot.org/uniprot/Q6MZT1</a>     |
| CQLNS    | Dynein heavy chain 7                                                    | <a href="https://www.uniprot.org/uniprot/Q8WXX0">https://www.uniprot.org/uniprot/Q8WXX0</a>     |
| CTASS    | Serine/threonine-protein kinase Nek7                                    | <a href="https://www.uniprot.org/uniprot/Q8TDX7">https://www.uniprot.org/uniprot/Q8TDX7</a>     |
| CSKLN    | NUAK family SNF1-like kinase 1                                          | <a href="https://www.uniprot.org/uniprot/O60285">https://www.uniprot.org/uniprot/O60285</a>     |
| CSKLN    | Olfactory receptor 4A8                                                  | <a href="https://www.uniprot.org/uniprot/P0C604">https://www.uniprot.org/uniprot/P0C604</a>     |
| CSKVN    | Thioredoxin domain-containing protein 16                                | <a href="https://www.uniprot.org/uniprot/Q9P2K2">https://www.uniprot.org/uniprot/Q9P2K2</a>     |
| CSLQQ    | Uncharacterized protein C1orf109                                        | <a href="https://www.uniprot.org/uniprot/Q9NX04-2">https://www.uniprot.org/uniprot/Q9NX04-2</a> |
| CSLLL    | Arylsulfatase B                                                         | <a href="https://www.uniprot.org/uniprot/P15848-2">https://www.uniprot.org/uniprot/P15848-2</a> |
| CSLFA    | NF-kappa-B-activating kinase-associated protein 1                       | <a href="https://www.uniprot.org/uniprot/Q9H6S1-4">https://www.uniprot.org/uniprot/Q9H6S1-4</a> |
| CSIFI    | Nuclear receptor coactivator 7                                          | <a href="https://www.uniprot.org/uniprot/Q8NI08-6">https://www.uniprot.org/uniprot/Q8NI08-6</a> |
| CSSAV    | Upstream transcription factor 3                                         | <a href="https://www.uniprot.org/uniprot/Q68DE3">https://www.uniprot.org/uniprot/Q68DE3</a>     |
| CSNTF    | Protein virilizer homolog                                               | <a href="https://www.uniprot.org/uniprot/Q69YN4-4">https://www.uniprot.org/uniprot/Q69YN4-4</a> |
| CAFLS    | Histone-lysine N-methyltransferase MECOM                                | <a href="https://www.uniprot.org/uniprot/Q03112-9">https://www.uniprot.org/uniprot/Q03112-9</a> |
| CFLSS    | N-alpha-acetyltransferase 16, NatA auxiliary subunit                    | <a href="https://www.uniprot.org/uniprot/Q6N069-4">https://www.uniprot.org/uniprot/Q6N069-4</a> |
| CLLFS    | Nuclear mitotic apparatus protein 1                                     | <a href="https://www.uniprot.org/uniprot/Q14980-3">https://www.uniprot.org/uniprot/Q14980-3</a> |
| CVSVS    | Phosphatidylinositol 4-phosphate 5-kinase type-1 gamma                  | <a href="https://www.uniprot.org/uniprot/O60331-2">https://www.uniprot.org/uniprot/O60331-2</a> |
| CQYNS    | Pituitary homeobox 1                                                    | <a href="https://www.uniprot.org/uniprot/P78337">https://www.uniprot.org/uniprot/P78337</a>     |
| CLFLS    | Regulation of nuclear pre-mRNA domain-containing protein 2              | <a href="https://www.uniprot.org/uniprot/Q5VT52-4">https://www.uniprot.org/uniprot/Q5VT52-4</a> |
| CLACS    | Slit homolog 3 protein                                                  | <a href="https://www.uniprot.org/uniprot/O75094">https://www.uniprot.org/uniprot/O75094</a>     |
| CASWQ    | lamin subunit gamma 3                                                   | <a href="https://www.uniprot.org/uniprot/Q9Y6N6">https://www.uniprot.org/uniprot/Q9Y6N6</a>     |

**Table S3.** CaaaX sequences in the human genome. Selected CaaaX sequences in the human genome and their associated proteins. Peptides selected for evaluation are shaded in grey.



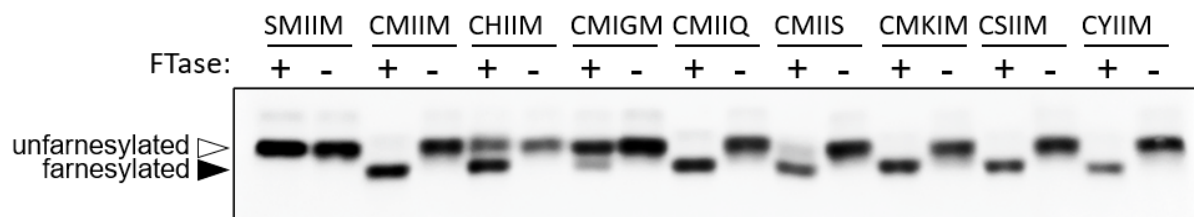

**Figure S13.** Mobility shift analysis of Ydj1p-CaaaX variants in the presence and absence of farnesyltransferase. Whole cell lysates were prepared and analyzed as described for Figure 5 except that each Ydj1p-CaaaX variant was expressed in two strains. One expresses FTase (yWS2544; *ydj1::KAN<sup>R</sup>*) and the other lacks FTase (yWS2452; *ydj1::KAN<sup>R</sup> ram1Δ*). The presence (+) or absence of FTase (-) correlates with the presence and absence, respectively, of the non-essential yeast gene RAM1 that encodes the beta subunit of farnesyltransferase.

| <u>Sample</u>                       | <u>Sequence</u> | <u>Biological Replicates</u> | <u>Technical Replicates</u> | <u>Average of Tech. Replicates<sup>1</sup></u> | <u>Standard Deviation<sup>2</sup></u> |
|-------------------------------------|-----------------|------------------------------|-----------------------------|------------------------------------------------|---------------------------------------|
| Controls                            | CASQ            | 4                            | 5                           | 100.0%                                         | 0.0%                                  |
|                                     | SASQ            | 4                            | 5                           | 0.0%                                           | 0.0%                                  |
|                                     | CMIIM           | 4                            | 7                           | 100.0%                                         | 0.0%                                  |
|                                     | SMIIM           | 4                            | 9                           | 0.0%                                           | 0.0%                                  |
| Sequences from MALDI libraries      | CHIIM           | 3                            | 4                           | 76.9%                                          | 25.9%                                 |
|                                     | CMIGM           | 3                            | 5                           | 39.5%                                          | 24.8%                                 |
|                                     | CMIIQ           | 2                            | 4                           | 100.0%                                         | 0.0%                                  |
|                                     | CMIIS           | 3                            | 5                           | 88.8%                                          | 10.9%                                 |
|                                     | CMKIM           | 3                            | 5                           | 99.4%                                          | 1.3%                                  |
|                                     | CSIIM           | 3                            | 5                           | 100.0%                                         | 0.0%                                  |
|                                     | CYIIM           | 3                            | 5                           | 100.0%                                         | 0.0%                                  |
| Sequences from the mammalian genome | CASLS           | 1                            | 3                           | 2.1%                                           | 3.6%                                  |
|                                     | CASSQ           | 1                            | 3                           | 0.0%                                           | 0.0%                                  |
|                                     | CLACS           | 1                            | 3                           | 0.6%                                           | 1.0%                                  |
|                                     | CLLFS           | 1                            | 3                           | 16.4%                                          | 2.4%                                  |
|                                     | CMTSQ           | 1                            | 3                           | 0.7%                                           | 1.2%                                  |
|                                     | CQYNS           | 1                            | 3                           | 0.0%                                           | 0.0%                                  |
|                                     | CSKLN           | 1                            | 3                           | 13.0%                                          | 5.5%                                  |
|                                     | CSLMQ           | 1                            | 4                           | 96.7%                                          | 4.7%                                  |
|                                     | CSQAS           | 1                            | 3                           | 0.0%                                           | 0.0%                                  |
|                                     | CVQTS           | 1                            | 3                           | 1.1%                                           | 2.0%                                  |

**Table S4.** Percent farnesylation for Ydj1p-CaaaX variants evaluated in this study.

<sup>1</sup>Values for band intensities of farnesylated and unfarnesylated species within gel lanes of Figures S12 and S13 were determined by the peak integration method using ImageJ [4]. reference; see below for options). These values were used to calculate percent farnesylation for individual samples that were averaged for multiple biological and/or technical replicates.

<sup>2</sup>Standard deviations were derived for all replicates using the Excel STDEV function.

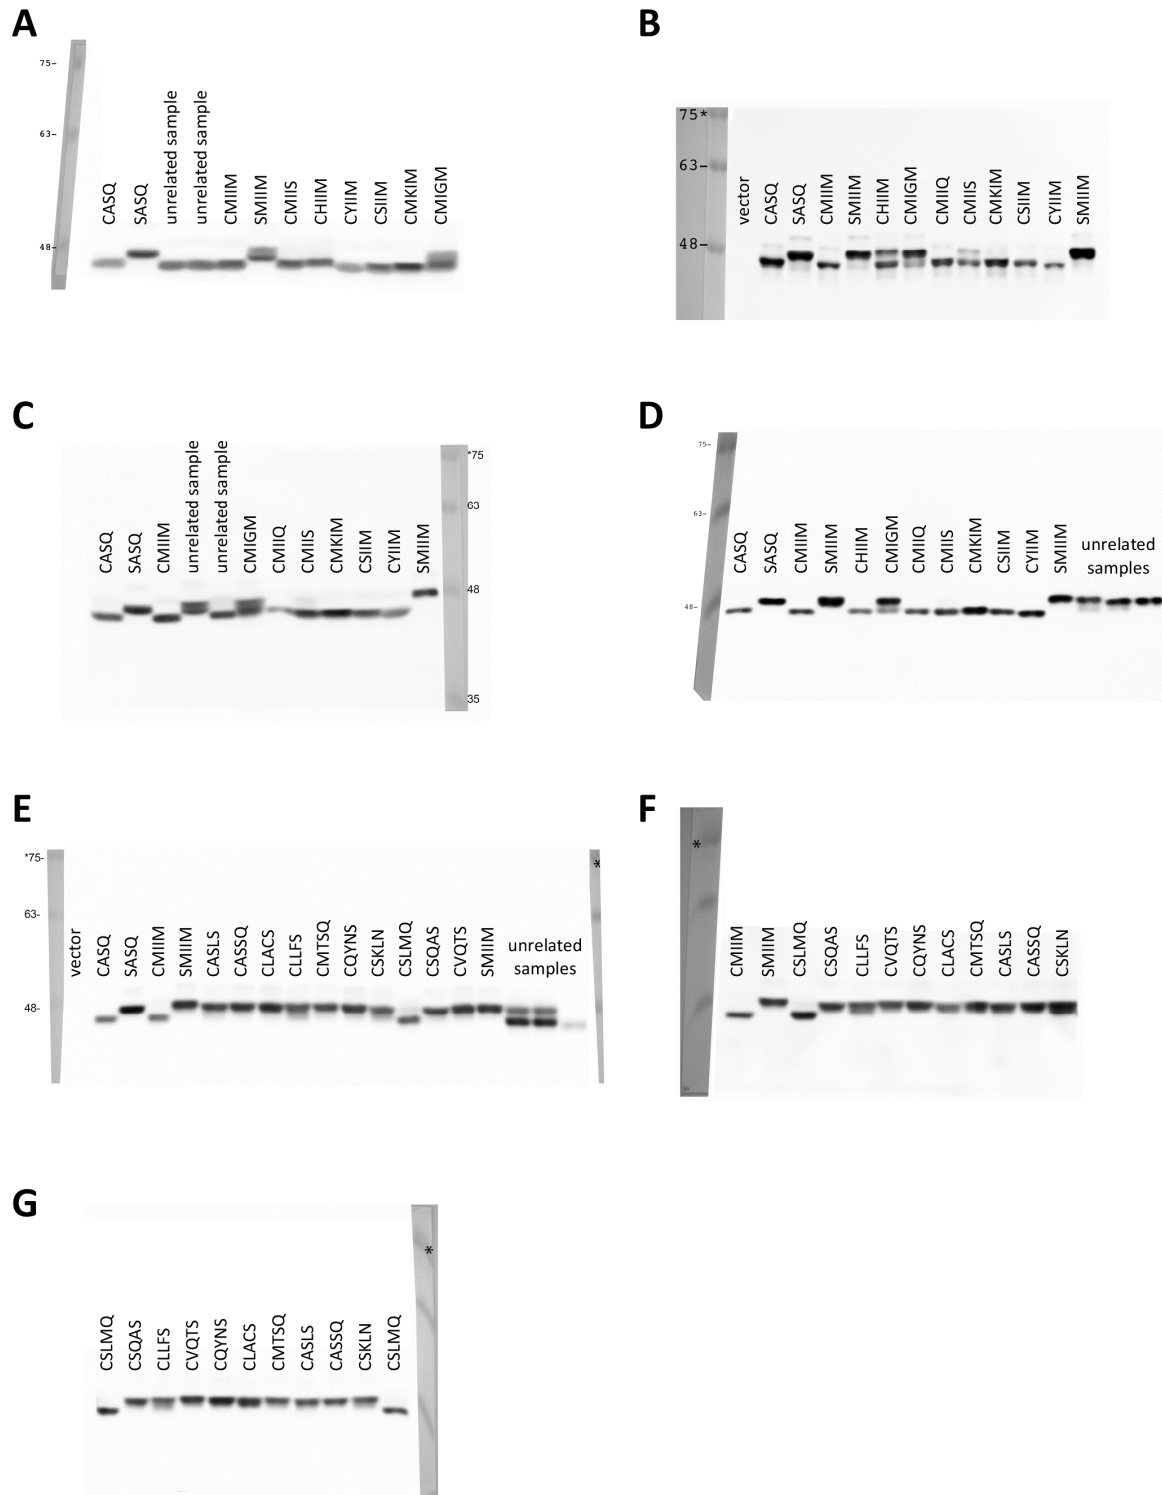

**Figure S14.** Mobility shift analysis of Ydj1p-CaaaX variants. A collage of anti-Ydj1p immunoblots representing the multiple biological and technical replicates of each Ydj1p-CaaaX variant that was analyzed in this study. Analysis was as described for Figures 5 and 6, with panels D and E representing uncropped versions of the blots used for Figures 5 and 6, respectively. These blots and the blot described for Figure S12 were used for determining the percent prenylation observed for each Ydj1p-CaaaX variant that is reported in Table S6. In each panel, the digital layer containing the anti-Ydj1p chemiluminescence signal is juxtaposed with the layer containing the prestained molecular weight standards that was captured in parallel under ambient light.

| Strain  | Genotype                                                                             | Reference |
|---------|--------------------------------------------------------------------------------------|-----------|
| yWS2542 | <i>MATa his3Δ1 leu2Δ0 met15Δ0 ura3Δ0 ram1::KAN<sup>r</sup> ydj1::NAT<sup>r</sup></i> | [1]       |
| yWS2544 | <i>MATa his3Δ1 leu2Δ0 met15Δ0 ura3Δ0 ydj1::NAT<sup>r</sup></i>                       | [1]       |

**Table S5.** Yeast strains used in this study.

| plasmid | genotype                   | Reference  |
|---------|----------------------------|------------|
| pRS416  | <i>CEN URA3</i> (vector)   | [2]        |
| pWS942  | <i>CEN URA3 YDJ1</i>       | [3]        |
| pWS1132 | <i>CEN URA3 YDJ1-SASQ</i>  | [3]        |
| pWS1488 | <i>CEN URA3 YDJ1-CMIIM</i> | [4]        |
| pWS1917 | <i>CEN URA3 YDJ1-SMIIM</i> | this study |
| pWS1918 | <i>CEN URA3 YDJ1-CMIIS</i> | this study |
| pWS1919 | <i>CEN URA3 YDJ1-CMIIQ</i> | this study |
| pWS1920 | <i>CEN URA3 YDJ1-CHIIM</i> | this study |
| pWS1921 | <i>CEN URA3 YDJ1-CYIIM</i> | this study |
| pWS1922 | <i>CEN URA3 YDJ1-CSIIM</i> | this study |
| pWS1923 | <i>CEN URA3 YDJ1-CMKIM</i> | this study |
| pWS1924 | <i>CEN URA3 YDJ1-CMIGM</i> | this study |
| pWS1981 | <i>CEN URA3 YDJ1-CSLMQ</i> | this study |
| pWS1982 | <i>CEN URA3 YDJ1-CSQAS</i> | this study |
| pWS1983 | <i>CEN URA3 YDJ1-CLLFS</i> | this study |
| pWS1984 | <i>CEN URA3 YDJ1-CVQTS</i> | this study |
| pWS1985 | <i>CEN URA3 YDJ1-CQYNS</i> | this study |
| pWS1986 | <i>CEN URA3 YDJ1-CLACS</i> | this study |
| pWS1987 | <i>CEN URA3 YDJ1-CMTSQ</i> | this study |
| pWS1988 | <i>CEN URA3 YDJ1-CASLS</i> | this study |
| pWS1989 | <i>CEN URA3 YDJ1-CASSQ</i> | this study |
| pWS1990 | <i>CEN URA3 YDJ1-CSKLN</i> | this study |

**Table S6.** Plasmids used in this study.

## References

- [1] S. Ashok, E.R. Hildebrandt, C.S. Ruiz, D.S. Hardgrove, D.W. Coreno, W.K. Schmidt, J.L. Hougland, Protein Farnesyltransferase Catalyzes Unanticipated Farnesylation and Geranylgeranylation of Shortened Target Sequences, *Biochemistry*. 59 (2020) 1149–1162. <https://doi.org/10.1021/acs.biochem.0c00081>.
- [2] R.S. Sikorski, P. Hieter, A system of shuttle vectors and yeast host strains designed for efficient manipulation of DNA in *Saccharomyces cerevisiae*., *Genetics*. 122 (1989) 19–27. <https://doi.org/10.1093/genetics/122.1.19>.
- [3] E.R. Hildebrandt, M. Cheng, P. Zhao, J.H. Kim, L. Wells, W.K. Schmidt, A shunt pathway limits the CaaX processing of Hsp40 Ydj1p and regulates Ydj1p-dependent phenotypes, *Elife*. 5 (2016) 1–22. <https://doi.org/10.7554/eLife.15899>.
- [4] M.J. Blanden, K.F. Suazo, E.R. Hildebrandt, D.S. Hardgrove, M. Patel, W.P. Saunders, M.D. Distefano, W.K. Schmidt, J.L. Hougland, Efficient farnesylation of an extended C-terminal C(x)3X sequence motif expands the scope of the prenylated proteome, *J. Biol. Chem*. 293 (2018) 2770–2785. <https://doi.org/10.1074/jbc.M117.805770>.
